1 **Sources of Stress and Coping Mechanisms: Experiences of Maternal Health Care**  
2 **Providers in Western Kenya**

3

4 Monica Getahun<sup>1¶</sup>, Edwina N Oboke<sup>2&</sup>, Beryl A Ogolla<sup>2&</sup>, Joyceline Kinyua<sup>3</sup>, Linnet  
5 Ongeri<sup>3</sup>, Mona Sterling<sup>1</sup>, Iscar Oluoch<sup>4</sup>, Audrey Lyndon,<sup>5</sup> and Patience A. Afulani<sup>1,6¶</sup>

6

7 <sup>1</sup>Institute for Global Health Sciences, University of California, San Francisco, San Francisco, California, United  
8 States of America.

9 <sup>2</sup>Global Programs for Research and Training, Nairobi, Kenya.

10 <sup>3</sup>Kenya Medical Research Institute, Nairobi, Kenya.

11 <sup>4</sup>Migori County Government, Migori, Kenya.

12 <sup>5</sup>NYU Rory Meyers College of Nursing.

13 <sup>6</sup>Department of Epidemiology & Biostatistics, University of California, San Francisco, San Francisco,  
14 California, United States of America.

15

16

17 \* Corresponding author

18 E-mail: [Monica.Getahun@ucsf.edu](mailto:Monica.Getahun@ucsf.edu)

19

20

21 ¶These authors contributed equally to this work.

22 &These authors also contributed equally to this work.

23

24

25 **Abstract**

26           The dynamic and complex nature of care provision predisposes healthcare workers to  
27 stress, including physical, emotional, or psychological fatigue due to individual,  
28 interpersonal, or organizational factors. We conducted a convergent mixed-methods study  
29 with maternity providers to understand their sources of stress and coping mechanisms they  
30 adopt. Data were collected in Migori County in western Kenya utilizing quantitative surveys  
31 with n=101 maternity providers and in-depth interviews with a subset of n=31 providers. We  
32 conducted descriptive analyses for the quantitative data. For qualitative data, we conducted  
33 thematic analysis, where codes were deductively developed from interview guides, iteratively  
34 refined based on emergent data, and applied by a team of five researchers using Dedoose  
35 software. Code queries were then analysed to identify themes and organized using the  
36 socioecological (SE) framework. Providers reported stress due to high workloads (61%); lack  
37 of supplies (37%), poor salary (32%), attitudes of colleagues and superiors (25%), attitudes of  
38 patients (21%), and adverse outcomes (16%). Themes from the qualitative analysis mirrored  
39 the quantitative analysis with more detailed information on the factors contributing to each  
40 and how these sources of stress affect providers and patient outcomes. Coping mechanisms  
41 adopted by providers are captured under three themes: addressing stress by oneself, reaching  
42 out to others, and seeking help from a higher power. Findings underscore the need to address  
43 organizational, interpersonal, and individual level stressors. Strategies are needed to support  
44 staff retention, provide adequate resources and incentives for providers, and ultimately  
45 improve patient outcomes. Interventions should support and leverage the positive coping  
46 mechanisms identified.

47

## 48 **Introduction**

49           The dynamic and complex nature of healthcare provision predisposes health care  
50 workers to numerous stressors, resulting in behavioural, psychological and physiological  
51 stress responses.<sup>1-3</sup> These stressors, some of which providers or may not have control over,  
52 have been well-described, and include high work load, unfavourable work environment and  
53 work conditions, witnessing negative outcomes among patients, and low rewards and  
54 incentives.<sup>4-8</sup> Continuous exposure to stressors without adequate coping mechanisms leads to  
55 burnout, which manifests as feelings of pessimism, cynicism, helplessness, detachment from  
56 one's job, and reduced professional efficacy.<sup>3</sup> Burnout affects job performance as well as the  
57 psychological and physical health of provider.<sup>3,9-11</sup>

58  
59           While high stress and burnout among healthcare workers is a recognized global  
60 crises,<sup>12</sup> providers in sub-Saharan Africa (SSA) are doubly burdened due to the additional  
61 stressors of working in resource-limited settings.<sup>13</sup> In addition to similar on-the-job stressors  
62 as providers in resource-rich settings, they also manage stressors of an overwhelming work  
63 load from extreme staff shortages and high patient volumes, not being able to provide best  
64 practice due to lack of drugs, supplies, and equipment, being required to manage  
65 complications beyond their competency, financial strain from poor remuneration, poor  
66 working conditions with insufficient basic resources, including scarcity of water and  
67 sanitation, and disrespectful and violent behaviors of patients.<sup>14-16</sup> Providers in SSA are a  
68 persistently high-risk group due to continuous exposure to these difficult situations; levels of  
69 provider stress and burnout in SSA are as high as 9 out of 10 healthcare workers experiencing  
70 some degree of burnout in some settings.<sup>17-20</sup>

71

72 Our study focuses specifically on maternal health staff, who by the nature of their  
73 work, face especially stressful working conditions. In addition to the stressors described,  
74 providers often manage double the patient load, coupled with feelings of inadequacy in the  
75 face of high maternal and new-born mortality.<sup>15</sup> Studies in Kenya and elsewhere have shown  
76 very high levels of burnout among maternity providers which impacts care quality.<sup>19–21</sup> The  
77 adverse impact of stress and burnout on patient experience and other patient outcomes have  
78 also been well documented.<sup>22–27</sup> Addressing stress and burnout in maternal health is thus an  
79 opportunity to promote person-centred maternal care, and improve health outcomes.<sup>20</sup>  
80 Although most of the daily stressors within maternity work settings are unavoidable, the  
81 ability of providers to cope and manage these stressors can directly influences their mental  
82 health status.<sup>28</sup> However, there is limited research on the causes of burnout and coping  
83 mechanisms adopted by maternity providers in SSA to guide the development of effective  
84 interventions to reduce or prevent burnout.<sup>13,29</sup> Further, in-depth qualitative studies, which  
85 explore the reasons for, consequences of, and adaptive strategies to stress and burnout, are  
86 even more limited.<sup>30, 31,32</sup> We sought to address this gap and document sources of stress and  
87 coping mechanisms among providers of maternal health care in rural Kenya to inform future  
88 interventions.

89

## 90 **Methods**

### 91 **Research team**

92 A team of researchers from Kenya and the US with quantitative and qualitative  
93 research expertise participated in data collection and analyses, with the oversight of the lead  
94 investigator (PA). Two field-based researchers (EN and BO) conducted all interviews and  
95 contributed to analyses and interpretation. The remaining team members contributed to other  
96 research activities including analysis and interpretation of data.

97 **Study setting and participants**

98           The study took place in Migori County, in the Nyanza Province of Kenya, across  
99 selected facilities in the eight sub-counties. Migori County is a predominantly rural county  
100 bordered by Tanzania to the south. The study setting has previously been described.<sup>33</sup> Study  
101 participants included nurses, midwives, clinical officers and support staff tasked with care  
102 provision in maternity units.

103

104 **Data collection**

105           This was a convergent mixed-methods study in which we collected quantitative data  
106 from n=101 maternity providers and qualitative data from a subset of n=31 providers, as  
107 previously described.<sup>34</sup> We purposively selected a range of clinical and non-clinical maternity  
108 providers, including nurses, midwives, clinical officers and support staff from government  
109 and mission/private hospitals and health centres. Participants were recruited in consultation  
110 with health administrators at the facilities, following permission from the County Health  
111 Directorate. Research assistants then visited the selected health facilities and introduced the  
112 study and obtained a list of all maternity staff as the initial list of eligible participants.  
113 Providers in each facility were then contacted, informed about the study objectives, invited to  
114 participate, and interviewed if willing to provide written informed consent. The goal in each  
115 facility was to recruit one or two clinical officers (if the facility had any), two or more nurses  
116 depending on the number of nurses available, and one or two support staff (nurse aids and  
117 cleaners) for the structured interviews. All providers in the maternity unit in the selected  
118 facility were eligible to participate and all present on the day of the interview were invited to  
119 participate given most facilities had fewer than the target number of providers available.

120

121 Quantitative data were obtained from a cross-sectional survey with providers from  
122 across n=30 facilities in the county. Respondents were administered a multidomain  
123 questionnaire programmed in RedCAP, covering demographics, person-centred maternity  
124 care, stress, and bias, among others, during interviews which lasted 40 to 60 minutes. We  
125 report on survey results related to sources of stress and coping mechanisms; other results  
126 from the survey have been published extensively.<sup>20,34</sup> Qualitative data are from in-depth  
127 interviews using a semi-structured interview guide. Interviews were audio-recorded and  
128 lasted about 30-60 minutes each. Both surveys and interviews were conducted in-person, in a  
129 private space within the health facility by BO or EN, in the respondents preferred language  
130 (Luo, English, or Kiswahili).

131

### 132 **Data analysis**

133 We conducted simple descriptive analysis of the survey data related to sources of  
134 stress and coping mechanisms. For qualitative data, we used thematic analysis where we first  
135 developed a coding framework based on the interview guide. Transcripts were then loaded  
136 into Dedoose software, where the coding framework was applied to an initial set of  
137 transcripts by three team members (PA, EN, BO). The deductive coding framework was  
138 iteratively refined following coding of the initial set of transcripts. The team met to discuss  
139 and resolve inconsistencies. Few new codes were generated following the coding of half of  
140 the transcripts, suggesting data saturation. Analytic and reflexive memos were used to  
141 develop themes. All transcripts were coded; codes were queried to generate code reports with  
142 attached texts, which were summarised in extended analytical memos where we considered  
143 both the semantic (surface) and latent (underlying) meaning of the text. These memos were  
144 then reviewed to identify themes which were organized using the socio ecological (SE)  
145 framework and representative quotes selected to illustrate each theme. The analysis was an

146 iterative process with findings discussed by the full team and the write up refined to provide  
147 an accurate and clear representation of the data. In analysing the qualitative data, we focused  
148 on salience rather than frequency.<sup>35</sup> The survey data is presented alongside the qualitative  
149 data to illustrate the frequency of various sources of stress and coping mechanisms.  
150 Integration is achieved in this convergent mixed methods design, with an interview guide  
151 developed to illustrate, elucidate, and explain the survey findings; interviewees sampled from  
152 the survey participant list; and then at the interpretation and reporting level with both  
153 qualitative and quantitative findings integrated in the results in the discussion.<sup>36,37</sup>

154

## 155 **Ethical Approval**

156 The study was approved by the Institutional Review Boards for Protection of Human  
157 Subjects of University of California, San Francisco and Kenya Medical Research Institute,  
158 and by the Kenya National Commission for Science, Technology & Innovation (NACOSTI).  
159 Approval for the study within Migori was granted by the County Commissioner and the  
160 County Director of Health. Written informed consent was obtained from all participants.

161

## 162 **Results**

### 163 **Participant demographics**

164 Most participants worked in public hospitals (43.6%) and health centers (43.6%),  
165 were nurses or midwives (61.4%), and had on average 6.7 years of experience. Most were  
166 female (62.4%), on average 33.7 years old, married (74.3%), had attained at least a college  
167 education (82.2%), and came from Migori county (66%). About 40% had a monthly salary of  
168 between 10,000 and 50,000 Kenyan Shillings (~\$100 to \$500) and 39% made 50,000 Kenyan  
169 Shillings or more. The demographic breakdown is similar for those who participated in only  
170 the IDs, as summarized in Table 1.

171

172 **Table 1. Participant characteristics.**

|                                 | <i>Survey<br/>(N=101)</i> |           | <i>Interviews<br/>(N=31)</i> |           |
|---------------------------------|---------------------------|-----------|------------------------------|-----------|
|                                 | No.                       | %         | No.                          | %         |
| Facility                        |                           |           |                              |           |
| Public Hospital                 | 43                        | 42.6      | 18                           | 58.1      |
| Public Health Center/Dispensary | 44                        | 43.6      | 9                            | 29        |
| Mission/Private Hospital        | 14                        | 13.9      | 4                            | 12.9      |
| Cadre/position                  |                           |           |                              |           |
| Nurse/Midwife                   | 62                        | 61.4      | 18                           | 58.1      |
| Clinical officer/Doctor         | 16                        | 15.8      | 3                            | 9.7       |
| Support staff                   | 23                        | 22.8      | 10                           | 32.3      |
| Years as provider: mean (SD)    | 101                       | 6.74(5.3) | 31                           | 6.7(5.9)  |
| Female                          | 63                        | 62.4      | 21                           | 67.7      |
| Age: mean (SD)                  | 101                       | 33.7(6.7) | 31                           | 34.4(7.0) |
| Married                         | 75                        | 74.3      | 23                           | 74.2      |
| College and above Education     | 83                        | 82.2      | 22                           | 71        |
| From County                     | 67                        | 66.3      | 23                           | 74.2      |
| Monthly salary <sup>a</sup>     |                           |           |                              |           |
| > 10,000Ksh                     | 20                        | 20.2      | 9                            | 29        |
| 10,000-50,000 Ksh               | 40                        | 40.4      | 11                           | 35.5      |
| > 50,000 Ksh                    | 39                        | 39.4      | 11                           | 35.5      |

*Notes: all totals equal to 101 except those marked <sup>a</sup> which have missing data with a total of 99*

173

174 **Quantitative results**

175           Most participants (54.9%) reported high workload and lack of supplies or equipment  
176 (14.5%) as their primary source of stress (Table 2). Secondary sources of stress included high  
177 workload (61.4%), lack of supplies and equipment (36.6%), poor salary (31.7%), attitudes of  
178 patients (20.8%), frequent staff turnover (17.8%), attitudes of colleagues (14.9%),  
179 personal/family problems (11.9%), incompetence of other providers (10.9%), attitude of  
180 superiors (9.9%), and death of mother (9.9%). Nearly half of providers (41.6%) reported they  
181 had ever lost a baby or mother during pregnancy or childbirth, with 57% of the deaths in the  
182 last year. Within the last year 34.4%, 37.7%, and 55.5% of providers reported they had been  
183 treated by a in a way that was disrespectful or humiliating by their superiors, colleagues, and  
184 patients, respectively. These sources of stress are further illustrated by the qualitative data.



185

186 **Table 2. Sources of stress, experiences of humiliation, and disrespect in the last year.**

|                                                                                        | Total |      |
|----------------------------------------------------------------------------------------|-------|------|
|                                                                                        | No.   | %    |
| <i>What causes you the most stress at work? (Only one option)</i>                      |       |      |
| High workload                                                                          | 55    | 54.5 |
| Lack of supplies or equipment                                                          | 15    | 14.9 |
| Poor salary                                                                            | 8     | 7.9  |
| Attitude of patients/ family members                                                   | 5     | 5.0  |
| Death of mother                                                                        | 3     | 3    |
| Frequent staff turn over                                                               | 3     | 3    |
| Attitude of colleagues                                                                 | 2     | 2    |
| Personal/Family problems                                                               | 2     | 2    |
| Incompetence of another provider                                                       | 1     | 1    |
| Other                                                                                  | 7     | 6.9  |
| <i>What else causes you the most stress at work? (Multiple options)</i>                |       |      |
| High workload                                                                          | 62    | 61.4 |
| Lack of supplies or equipment                                                          | 37    | 36.6 |
| Poor salary                                                                            | 32    | 31.7 |
| Attitude of patients and family members                                                | 24    | 23.8 |
| Frequent staff turn over                                                               | 18    | 17.8 |
| Attitude of colleagues                                                                 | 15    | 14.9 |
| Personal/Family problems                                                               | 12    | 11.9 |
| Incompetence of another provider                                                       | 11    | 10.9 |
| Attitude of superiors                                                                  | 10    | 9.9  |
| Death of mother                                                                        | 10    | 9.9  |
| Death of baby                                                                          | 6     | 5.9  |
| Lack of knowledge or skills to provide needed care                                     | 4     | 4    |
| Other                                                                                  | 20    | 19.8 |
| <i>Have you ever lost a mother or baby during pregnancy or childbirth?</i>             |       |      |
| No                                                                                     | 59    | 58.4 |
| Yes                                                                                    | 42    | 41.6 |
| <i>Type of death</i>                                                                   |       |      |
| Maternal death                                                                         | 7     | 16.7 |
| Still birth                                                                            | 21    | 50   |
| Neonatal death                                                                         | 13    | 31   |
| Other death                                                                            | 1     | 2.4  |
| <i>Did this happen in the last year?</i>                                               |       |      |
| No                                                                                     | 18    | 42.9 |
| Yes                                                                                    | 24    | 57.1 |
| <i>Treated by superior in a way that was disrespectful or humiliating in last year</i> |       |      |
| No, never                                                                              | 65    | 65.7 |
| Yes, a few times                                                                       | 25    | 25.3 |
| Yes, many times                                                                        | 7     | 7.1  |
| Yes, always                                                                            | 2     | 2    |

|                                                                                         |    |      |
|-----------------------------------------------------------------------------------------|----|------|
| <i>Treated by colleague in a way that was disrespectful or humiliating in last year</i> |    |      |
| No, never                                                                               | 63 | 62.4 |
| Yes, a few times                                                                        | 32 | 31.7 |
| Yes, many times                                                                         | 5  | 5    |
| Yes, always                                                                             | 1  | 1    |
| <i>Treated by patient in a way that was disrespectful or humiliating in last year</i>   |    |      |
| No, never                                                                               | 45 | 44.6 |
| Yes, a few times                                                                        | 35 | 34.7 |
| Yes, many times                                                                         | 18 | 17.8 |
| Yes, always                                                                             | 3  | 3    |

187 **Qualitative results**

188 We used the socioecological (SE) framework to present experiences of, responses to,  
 189 and coping mechanisms related to stress among maternal health providers. Our findings  
 190 highlight the multiple levels of influence from policy (health system levels), institutional  
 191 (facility level), interpersonal (among providers and patients), to intrapersonal levels (at the  
 192 individual provider level). We present six themes related to sources of stress, which are  
 193 discussed in relation to their impact at one or more levels of the SE framework. Many of the  
 194 stressors discussed were at the policy, health systems and interpersonal levels, while fewer  
 195 stressors were identified at the intrapersonal levels.

196

197 **Policy and health-systems stressors**

198 We present four themes—high workload, lack of work resources, avoidable deaths,  
 199 and inadequate rewards— at this level.

200

201 ***High workload***

202 As in the quantitative data, providers prioritized discussion of stress related to high  
 203 workload. This was reportedly due to inadequate staffing, high patient volume, high staff  
 204 turnover, and additional job functions. Nurses and clinical officers described often being the  
 205 only providers during a shift, thus having to multitask across units and cover both outpatient

206 and inpatient services. This was reported to be stressful and limited their ability to provide  
207 high quality respectful care.

208 *“You find in a shift, you can be one nurse, you need to attend to both [...] mothers in*  
209 *labor, then there are those mothers who are post-natal who need to be discharged[...]*  
210 *having all these departments, and having one person manning, at times you can have*  
211 *some burnout [...] you end up not giving somebody that respect [...] you don’t give*  
212 *that respectful care.”* **Male, Clinical Provider, ID 1151**

213

214 Other providers reported a lack of breaks or time for themselves. As a support staff notes:

215 *“I don’t even get time to be free when I get here in the morning [until I leave] in the*  
216 *evening, I don’t even get time to be free.”* **Female, Support Staff, ID 1232**

217

218 Additionally, providers shared how high turnover, often due to the “*rationalization process*,”  
219 a national level strategy where providers are periodically reposted to other facilities, resulted  
220 in inadequate staffing, and increased stress.

221 *“They have taken some staff from [X facility], so the staffing is very low, and the work*  
222 *is high. So sometimes you find that you get overwhelmed; you feel tired, you are*  
223 *stressed and whenever you are in that condition, then you will not deliver [care]*  
224 *well.”* **Female, Clinical Provider, ID 1081**

225

226 Support staff also echoed concerns about understaffing, relaying that at times, they are asked  
227 to support clinical care, despite lacking the training or qualifications. One nurse’s aide  
228 described a stressful incident where she was unable to support a mother due to her lack of  
229 training to manage the condition.

230 *“I felt so bad and so hurt because I had a feeling that this lady was dying and am*  
231 *[looking at] her. She could look at me and tell me ‘Please just help’, but I had nothing*  
232 *I could do. Even as she was being taken away, I could still ask myself, like, ‘why did*  
233 *she get PPH [Postpartum haemorrhage]?’ [...] that could be my worst day...”*

234 **Female, Support Staff, ID 2211**

235

236 Some providers shared that a significant proportion of their time was often spent on non-  
237 clinical activities, particularly documentation and administrative work related to performance  
238 metrics. These administrative tasks were perceived to take away from time with patients. The  
239 combination of staff shortage and increased administrative responsibilities led to high stress  
240 as discussed by a nurse:

241 *“Generally, this place there is shortage of staff and there is a lot of work, so you find*  
242 *yourself stressed, you want to do everything and with a lot of documentation because*  
243 *what you don’t document is not counted as done.”* **Female, Clinical Provider, ID**

244 **2010**

245

246 The experience of being overworked and insufficient staffing, led to providers requesting,  
247 and at times bribing, to avoid being assigned to the maternity ward. As a nurse notes:

248 *“When they are doing change overs for maternity, no one wants to be taken to*  
249 *maternity; some even bribe the administration not to be brought to maternity. [When*  
250 *someone is] brought by force because no one is willing to work at the maternity ward*  
251 *or you find yourself [here] by circumstances, if you are a weakling and you can’t*  
252 *complain.”* **Female, Clinical Provider, ID 2011**

253

254 ***Lack of work resources***

255 This theme covers several issues providers described as sources of stress related to  
256 inadequate resources to perform their jobs. These include lack of equipment, supplies, and  
257 drugs, and inadequate patient referral systems.

258

259 Providers attributed being stressed due to the lack of proper equipment. This resulted in  
260 situations where they had to improvise with less efficient and more time-consuming  
261 alternatives.

262 *“We don’t have the equipment to do the services. Let’s say there is no solo shots to*  
263 *use for vaccine, so you are forced to use a 2cc [syringe]...So those solo [syringes] are*  
264 *not there so we are using 2cc to inject the children.”* **Male, Clinical Provider, ID**

265 **1121**

266

267 In other situations, providers reported borrowing equipment from other units, including blood  
268 pressure monitors, limiting their ability to provide frequent blood pressure monitoring in the  
269 management of pre-eclampsia:

270 *“There is no [blood pressure] machine at the maternity ward. Maybe we have a*  
271 *mother who has pre-eclampsia, and she really needs to be monitored closely. There is*  
272 *no BP machine [so] we keep borrowing from other wards. Sometimes we go to the*  
273 *other ward, and they are also busy with the BP machine [...] we also need to know*  
274 *the pressure to see whether the medication is [addressing] the blood pressure.”*

275 **Female, Clinical Provider, ID 2010**

276

277 Providers noted that inadequate pharmaceutical and non-pharmaceutical supply chain  
278 resulted and shortage in supplies and medicines, ranging from basic reagents to lifesaving

279 oxygen. Such shortages were stressful because it impacted the quality of care provided to  
280 patients and sometimes resulted in poor outcomes, even death. A provider notes:

281 *“Just like I said before, is lack of sufficient commodities and supplies. So there comes*  
282 *a patient who is so sick and is need of something, but you are so helpless, you don’t*  
283 *have the thing. So at times, we may end up losing the patient; but it is not your fault,*  
284 *but lack of supplies.”*

285 **Female, Clinical Provider, ID 1142**

286

287 The lack of supplies at the facilities also often required that women bring basic materials such  
288 as cotton wool, gloves, and warm clothes when being admitted to the hospital to deliver their  
289 babies. However, nurses reported that some mothers arrive at the facility not having these  
290 items, which compromises the quality of care. Further, these instances were perceived to  
291 impact patient-provider interactions, where providers are at times unaware of patient-level  
292 challenges, and patients expect basic supplies to be available at a public facility. Providers  
293 reported some patients were even abusive towards them, causing them stress.

294 *“Patients have got their expectation; this is a government hospital. You see if there*  
295 *are no drugs, the patient comes and tells you, and you trying to write to the patient*  
296 *the drug, but at the back of your mind you know very well the drug is not within the*  
297 *hospital. Already, psychologically, you are affected.”* **Male, Clinical Provider, ID**

298 **2102**

299

300 The lack of supplies reportedly resulted in an unofficial marketplace where some providers  
301 were reported to acquire and sell supplies to patients, often at a higher cost. Supplies such as  
302 cotton wool, which providers felt should be freely available in the facility, were reportedly  
303 sold to patients. This was especially stressful for support staff who also served as community

304 health volunteers, as it conflicted with what they told women in the communities in their  
305 efforts to convince women to give birth at the health facility.

306 *“There are some nurses who have their own supplies or those that they have taken*  
307 *from the facility. When I see the nurse sell the mother something like a cotton wool*  
308 *that costs two hundred (ksh), they sell to the mother at five hundred (ksh), it really*  
309 *pains me [...] I feel like they are oppressing the poor mothers. I feel bad [...]. In the*  
310 *community, [I] teach them that these things are free, but when they come to the*  
311 *facility they are asked for more money for an item.”* **Male, Support staff ID 1111**

312  
313 Another major source of stress was lack of transportation and poor referral systems. Providers  
314 noted the lack of ambulances within the health facilities, and the need to wait with patients  
315 and often for long periods, after making a call for an ambulance for transfers. Others shared  
316 needing to find alternate modes of transportation. This was stressful because it often delayed  
317 care and led to poor outcomes.

318

### 319 ***Avoidable deaths***

320 A major source of stress identified was the constant fear of losing a patient from  
321 complications that could be managed. The scarcity of ambulances was sometimes  
322 compounded by the lack of equipment, supplies, and medicines within the ambulance, which  
323 in some instances reportedly led to death.

324 *” We tried to resuscitate, and we didn’t have an ambulance on standby and we called*  
325 *one from X referral. By the time the ambulance got here, it came without equipment,*  
326 *without the oxygen; the child went and when we followed up, we were told that the*  
327 *baby died and that it was a first-time mother [...] It was horrible because we really*  
328 *struggled and we all didn’t sleep; our only hope was that if an ambulance could*

329           *come, and we were very specific that we were not only asking for an ambulance but*  
330           *we wanted one with an oxygen where we could continue resuscitating the baby.”*

331           **Female, Clinical Provider, ID 2171**

332

333   The perception that adverse patient outcomes could have been avoided with an adequate  
334   referral system was distressing.

335           *“You refer the mother, and she ends up losing the baby on the way. When she tells*  
336           *you that, you feel unhappy because, if we had [an ambulance] here, you would have*  
337           *saved the baby. But due to the cold on the way and lack of transport, taking long to*  
338           *wait for the ambulance to come [...] because when you are doing referrals [...] by the*  
339           *time she reaches Migori she would have lost the baby, so you feel unhappy.”* **Female,**

340           **Clinical Provider, ID 2141**

341

342   Other sources of stress included poor infrastructure and utilities, such as lack of consistent  
343   water and sanitation facilities, and power outages, which impacted the care environment,  
344   provider and patient experience, and patient outcomes.

345           *” Sometimes, the electricity goes off when a mother has delivered a preterm and there*  
346           *is no source of heat. So, the baby ends up dying- a death that could be avoided.”*

347           **Female, Support Staff, ID 1102**

348

349   The fear of avoidable deaths made diagnoses of any complications stressful, as providers  
350   recounted traumatic experiences related to adverse events experienced by mothers and their  
351   babies. Challenges related to post-partum haemorrhaging (PPH), inability to resuscitate, and  
352   death of mothers and babies were scenarios that were reported to cause stress. A nurse  
353   discussed PPH as something that causes panic during management, and leads to stress:



354            *“What stresses me particularly at this age and at this time [...] stress at work. Ok*  
355            *stress can come, for example, you conducted a delivery you have seen that you have*  
356            *conducted a delivery you see that mother has developed PPH, you will kind of have*  
357            *some serious concern. Can this mother make it? and if at all you have delivered a*  
358            *baby and has come out flat, you can get worried [...] you feel what went wrong and*  
359            *you can feel what happened. You can feel because the relatives, maybe they can say*  
360            *‘this doctor has made us to lose the child’...”* **Male, Clinical Provider, ID 1151**

361

### 362 ***Inadequate rewards for efforts***

363 Issues under this theme include delayed salaries or inadequate salaries, poor job security, and  
364 poor promotion prospects. These issues often made providers feel their efforts were not  
365 appreciated. Provider reports of delayed salaries or inadequate salaries was especially salient  
366 for support staff who described not being paid enough, and often not paid on time, given all  
367 their work in the facilities.

368            *“What stresses me is the county, we work so hard, but the pay is so little. Like, we are*  
369            *only paid two thousand shillings per month. So, at times, I feel like quitting the job but*  
370            *know that I enjoy doing the work [...] so that is what stresses me. Because if they*  
371            *could have increased [my salary] to even five thousand shillings, then it would be a*  
372            *little [better].”* **Male, Support Staff, ID 1111**

373

374 Inadequate and delayed salaries was also stressful for providers as it impacted their ability to  
375 support their families. Further, it decreased providers’ motivation for their work as they did  
376 not feel they were receiving adequate rewards or incentives.

377            *“The reward is so low compared to the amount of work that I am doing. I do a lot and*  
378            *I think everybody knows that us nurses, we do a lot that the reward that we get from it*

379 *is not tallying [...] You know, there is an extent when you give your responsibility*  
380 *your all, all the energy, all the concentration, all your mind, then you find [...] that*  
381 *maybe your salary has delayed or the salary has not been paid or there are things*  
382 *that you are supposed to use that money to support [families] and you are not able*  
383 *to.” Male, Clinical Provider, ID 1221*

384

385 Job security was noted as a stressor by contract staff who had to renew their contracts yearly.  
386 Further some providers discussed poor promotion prospects as a source of stress.

387 *“... let’s say you have work in one job group for longer period and you need to be*  
388 *promoted and you cannot be promoted, you become demoralized” Female, Clinical*  
389 *Provider, ID 1041*

390

391

## 392 **Interpersonal**

393 Themes related to providers’ interactions with other providers and patients are captured at the  
394 interpersonal level. These include perceived negative attitudes of superiors and colleagues as  
395 well as patients, and patients delayed care seeking.

396

### 397 *Perceived negative attitudes of supervisors and colleagues*

398 Some providers discussed stressful situations related to conflict with leadership and resulting  
399 supervisory visits described as fault-finding missions. Others complained about an  
400 unsupportive leadership style which subjected providers to increased stress. A provider  
401 recalled:

402 *“I got into a conflict with a hospital [leader] recently. My son was sick, and I was on*  
403 *duty and for you to be given a sick leave, it is a process and at that time I was busy. I*

404 *tried to get someone to work for me together with another qualified nurse who was on*  
405 *duty. This ended up bringing some trouble for me. [Leadership] was trying to say that*  
406 *I neglected my duty...and even reported me to the county [...] I even felt like I should*  
407 *leave this job and go to rest.” Female, Clinical Provider, ID 2011*

408

409 Providers also discussed negative feedback from supervisors that was perceived to fuel stress.  
410 Superiors were perceived to focus on the negatives, neglecting the positives, which was  
411 described as stressful.

412 *“There was this particular day when I felt so bad [...] my superior said that I usually*  
413 *come to work late, and I close work early; [...] In fact, a day before, [my superior]*  
414 *came around 4:52pm to check whether I was around [...], I found [her] standing at a*  
415 *strategic point maybe waiting for me to see whether I was really in, or [if I was not at*  
416 *the duty post and was conspiring with my colleague]. I felt bad that I almost cried. It*  
417 *really hurt me.” Female, Clinical Provider, ID 1181*

418

419 Similarly, other providers noted stress due to the negative attitudes and comments from other  
420 colleagues that was discouraging. One provider recalled:

421 *“... I like spending a lot of time in the hospital and you end up seeing clients past*  
422 *8:00pm then the following time you come late, you try to explain to someone that ‘I*  
423 *really left late yesterday’, they never take it positive. So sometimes you hear some*  
424 *negative comments from colleagues that you are always coming late. So, you see,*  
425 *some of those things they discourage you.” Female, Clinical Provider, ID 2171*

426

427 ***Perceived negative patient attitude and behaviour***

428 Providers also described the attitude and behaviour of patients as causing stress because it  
429 impacts care provision and outcomes. Providers were especially frustrated by patients who  
430 did not follow instructions such as pushing the baby when they were instructed not to push or  
431 refusing referrals.

432 *“...this mother was very uncooperative, and she started pushing at 6 cm dilation. So,*  
433 *I took this mother and explained to her the dangers of pushing earlier and she was not*  
434 *listening, so she kept on pushing and as I was doing my vaginal exam, it was still 6*  
435 *cm [...] the cervix was tight and thick. At the same time, on my examining finger, I*  
436 *see meconium stain grade three- sign of foetal distress.”* **Female, Clinical Provider,**  
437 **ID 1081**

438

#### 439 *Women’s delayed care seeking behaviour*

440 Women first attempting delivery at home or with Traditional Birth Attendants (TBAs) before  
441 coming to the facility was described as stressful because it complicated the management of  
442 otherwise simple cases. For example, the traditional medicines provided by TBAs were  
443 perceived to act similar to oxytocin, putting the mother at risk of an overdose when labour  
444 was later augmented at the facility. Further, women visiting TBAs or attempting home births  
445 prior to presenting at the facility for emergency care, limited providers’ ability to provide  
446 timely and efficacious care. As one clinician notes:

447 *“This area is chaotic for TBAs- they start these herbs that in their opinion hastens the*  
448 *labor and they only refer to the facility when they think that there is a problem they*  
449 *can’t handle [...] if the client comes and you can clearly see the herbs, like they have*  
450 *them in the mouth and some are entered in the perineum -so you can see them after*  
451 *examination[...] they are meant to work like oxytocin, you also want to put in an*  
452 *oxytocin which is an intervention for you; so it’s like you are doubling the dose and*

453            *you are risking tears or even raptures to the uterus.”* **Female, Clinical Provider, ID**

454            **1171**

455    **Individual level**

456    Fewer individual-level stressors were discussed, with most in response or in relation to  
457    stressors at the health systems and at the intrapersonal levels. Thus, we present below, non-  
458    work-related stress and other expressions of stress that intersect with the individual  
459    experience.

460

461    *Non-work-related stress*

462    A few providers discussed challenges at home and with their families that often impacted  
463    their attitudes, perceptions, and functioning at the workplace. These challenges included  
464    health or death of family members, marital and financial conflicts, and problems with their  
465    children. One support staff discussed how home situation sometimes influences her mood at  
466    work:

467            *“... I love children but apart from my work, I don’t see like my life is moving ok [...] I*  
468            *separated with my husband, [and] what makes me sad sometimes is you could be*  
469            *talking to children [at work] and you are happy, but I ask myself now how does my*  
470            *own children survive? Even when I was happy, I just feel sad.”* **Female, Support**

471            **Staff, IDI 2072**

472

473            Another support staff discussed how conflict with her husband led to stress:

474            *“I mostly get stressed only when am at home because of the shouting’s and fighting*  
475            *from my husband. Like now, he married a second wife and am the first wife. So, the*  
476            *husband keeps quarrelling with me, this second wife is even older than me in age and*

477 *I can't say anything about it. If I do, the man [husband] wants to beat me and this*  
478 *makes me so stressed."* **Female, Support Staff, ID 2061**

479

480 Further, sometimes stress at home may providers to mistreat patients, especially those they  
481 perceive to be challenging.

482 *"If you have stress from home, then you will not treat the patients the same; maybe*  
483 *some you treat well, but you just feel like this other patient is annoying, so you just*  
484 *end up treating her in a cruel way..."* **Female, Clinical Provider, ID 1181**

485

#### 486 ***Effect of stressors on individual providers***

487 Providers described how various stressors affected them individually. These included feelings  
488 of frustration, hurt, sadness, demotivation, exhaustion, demoralization, discomfort,  
489 incompetence, loss of control, and other negative thoughts or actions.

490 *"I felt so sad, I lost vision until I felt like I was a mad man walking down the streets"*

491 **Female, Support Staff, ID 1102**

492

493 *"...for me, if I learn that the patient is not comfortable with me, I will feel bad and*  
494 *ask myself if I have done something wrong [...] that definitely makes me feel*  
495 *uncomfortable and disturbed because now you are not able to do your job*  
496 *holistically."* **Female, Clinical Provider, ID 2011**

497

498 Lack of supplies, drugs, and equipment and poor referral system described above often  
499 frustrated the providers, especially when this happened for prolonged periods and interfered  
500 with patient care. Losing a baby evoked feeling of sadness, especially if the baby could have  
501 been saved with the right equipment or supplies.

502           *“When you are doing referrals, and this place [referral facility] is distant, by the time*  
503           *[the mother] reaches [there], she would have lost the baby, so you feel unhappy.”*

504           **Female, Clinical Provider, ID 1142**

505   Even when they managed to save the baby and were happy with the outcome, the stress of the  
506   situation itself, often left providers feeling exhausted.

507           *“I also felt challenged because in the process I realized the things that I didn’t do*  
508           *promptly, because you know saving the baby at that time really needs speed and*  
509           *equipment; there are things that maybe you have to improvise, like, I can remember*  
510           *the time where the baby had already picked and we needed to put her on oxygen but*  
511           *what we realized we didn’t have the nose pumps to deliver throat oxygen directly, so*  
512           *we had to use some improvised method, which was not very efficient[...] such kind of*  
513           *an experience leaves you very weary and tired.”* **Female, Clinical Provider, ID 1222**

514

515   Although most providers discussed the effect of these stressors in relation to patient  
516   outcomes, some discussed potential effects of the stressors on providers behaviour such as  
517   intention to quit their jobs.

518           *“I feel very bad; I end up thinking of so many things like even quitting this job but*  
519           *again I look at the future. It is only this job that stresses me.”* **Female, Clinical**

520           **Provider, ID 1181**

521

522   A provider discussed the physical effects of stress on her with symptoms such as headaches  
523   and nosebleeds:

524           *“When I am stressed first, I get nosebleeds and I have a lot of headaches.”* **Female,**  
525           **Support Staff, ID 2021**

526

527 Other potential outcomes of the stressors discussed included migration out of the country,  
528 marital problems, and alcoholism.

529 *“Most of the time the employers have not taken time to try to find out why we are*  
530 *flying out to work in Europe, why are most of the nurses not married and why are we*  
531 *drinking alcohol too much?”* **Male, Clinical Provider, ID 1221**

532

### 533 **Stress coping mechanisms**

534 When asked how they dealt with stress, providers shared various ways they coped  
535 with their stress including talking with friends or relatives, spending time with family and  
536 friends, as well as praying, singing, and participating in religious activities. Other coping  
537 mechanisms focused on individual activities such as sleeping, listening to music or watching  
538 television, or willing oneself to forget about the problem or stress. Table 3 below details  
539 quantitative data on activities providers used to help manage or cope with stress, with  
540 representative quotes. These data demonstrate varying loci of control, with some providers  
541 expressing an external stress management at the interpersonal level, while others utilized  
542 more individual level stress coping mechanisms.

543

544 **Table 3: Coping mechanisms with illustrative quotes.**

| <b>What do you do when you are feeling stressed or burnt out?</b> | <b>N</b> | <b>%</b> | <b>Illustrative quotes</b>                                                                                                                                                                                                                                                                                      |
|-------------------------------------------------------------------|----------|----------|-----------------------------------------------------------------------------------------------------------------------------------------------------------------------------------------------------------------------------------------------------------------------------------------------------------------|
| Talk to friends or relatives                                      | 37       | 36.6     | <i>“I can say she [a friend] is one of the persons that I will always have to [talk to]. We always spend time, we always chat, we can even chat up to midnight. We laugh a lot, yeah, it really gets my stress out.”</i> <b>Male, Clinical Provider, ID 2011</b>                                                |
| Pray or engage in other religious practice                        | 22       | 21.8     | <i>“I go to church and that is what pushed me to listen to gospel music. When I was in deep stress and there is this female gospel singer that really inspired me. In a nutshell, I could go to church, and from there, I could get relieved. I usually feel like I have debugged from all my heavy burdens</i> |



|                                                                                                                                                                                                                                                                                                  |    |      |                                                                                                                                                                                                                                                                                                                                                                                                                                                                                                                         |
|--------------------------------------------------------------------------------------------------------------------------------------------------------------------------------------------------------------------------------------------------------------------------------------------------|----|------|-------------------------------------------------------------------------------------------------------------------------------------------------------------------------------------------------------------------------------------------------------------------------------------------------------------------------------------------------------------------------------------------------------------------------------------------------------------------------------------------------------------------------|
|                                                                                                                                                                                                                                                                                                  |    |      | <i>whenever I go to church.”</i> <b>Male, Clinical Provider, ID 1221</b>                                                                                                                                                                                                                                                                                                                                                                                                                                                |
| Sleep/nap                                                                                                                                                                                                                                                                                        | 22 | 21.8 | <i>“When I am tired, most of the time I like sleeping on these beds [at work], I sleep then after ten minutes I wake up and then I will be okay.”</i> <b>Female, Support Staff, ID 1191</b>                                                                                                                                                                                                                                                                                                                             |
| Spend time with family or friends                                                                                                                                                                                                                                                                | 20 | 19.8 | <i>“I have a husband who is so caring; the moment he realizes that am withdrawn; he is there for me because he can just tell when am stressed out. So, he tells me so many stories and the stress just go away.”</i> <b>Female, Clinical Provider, ID 1181</b>                                                                                                                                                                                                                                                          |
| Meditate/ Take deep breaths                                                                                                                                                                                                                                                                      | 9  | 8.9  | <i>n/a</i>                                                                                                                                                                                                                                                                                                                                                                                                                                                                                                              |
| Exercise or play a game                                                                                                                                                                                                                                                                          | 4  | 4    | <i>“Maybe like weekends, I decide to go out and play football in the evening with my friends.”</i> <b>Male, Support Staff, ID 1111</b>                                                                                                                                                                                                                                                                                                                                                                                  |
| Drink alcohol                                                                                                                                                                                                                                                                                    | 4  | 4    | <i>“If mostly the next day am on off duty then I can drink a couple of bottles of beer then I feel good though it’s a bad coping mechanism, but it forces me to.”</i> <b>Male, Clinical Provider, IDI 2141</b>                                                                                                                                                                                                                                                                                                          |
| Others:<br><ul style="list-style-type: none"> <li>• Talk to colleagues</li> <li>• Rest/relax</li> <li>• Watch television or movies</li> <li>• Eat</li> <li>• Drink water</li> <li>• Use of phone</li> <li>• Isolate oneself</li> <li>• Do something else to distract</li> <li>• Smoke</li> </ul> | 46 | 45.5 | <i>“...when I am at work, I feel good because I share with my colleagues, and I forget about my problems...”</i> <b>Female, Support Staff, ID 2211</b><br><br><i>“When I know I am frustrated I don’t even attend to patient. I relax. I can even ask for time off and stay at home.”</i> <b>Female, Clinical Provider, ID 1112</b><br><br><i>“Just sitting watching. Like I have said am a fan of watching movies, as long as I have sat and staring at the television.”</i> <b>Female, Clinical Provider, ID 2172</b> |
| Notes: Percentages may not add up to 100 since providers mentioned multiple stress reduction and coping strategies. N/A means the strategy did not come up in the qualitative interviews.                                                                                                        |    |      |                                                                                                                                                                                                                                                                                                                                                                                                                                                                                                                         |

545

546 Not acknowledging their situation as stressful also seemed to be a coping mechanism for  
547 some who reported stress was not a problem for them. One provider proudly responded that  
548 nothing stresses him, asking the interviewer to ascertain whether he ‘looked’ like someone  
549 experiencing stress. Similarly, others reported not giving their colleagues and the health  
550 system the opportunity to stress them by either ignoring them or coming together to find  
551 solutions to address their problems.

552           *“Stress? I’m not seeing anything that can give me stress; colleagues can’t give me*  
553           *stress, MOH can’t give me stress [...] I don’t give them that chance to stress [me],*  
554           *when they want to stress me up, I ignore them.” Male, Clinical Provider, ID 1121*

555  
556           *“[Unless] I carried the stress from home to work, but I don’t see anything at work*  
557           *that causes me stress. I would have stress if I were not in good terms with the staffs,*  
558           *but in case there is a problem let’s say shortage of something we come together as a*  
559           *team and solve it, and therefore that’s why I say at work, I don’t have any stress.”*

560           **Female, Clinical Provider, ID 2141**

561

## 562 **Discussion**

563           We found various contributors to stress at the health systems, intrapersonal, and  
564           individual levels, with many of the stressors identified at the health systems and policy level.  
565           High workload and lack of resources were the main drivers of stress, and further compounded  
566           provider stress related to avoidable deaths. In instances where system-failures resulted in  
567           negative patient outcomes, providers were especially stressed and demoralized. Other  
568           stressors were attributed to perceived inadequate rewards, including insufficient and delayed  
569           pay; negative attitudes and behaviors of superiors, colleagues, and patients; and managing  
570           maternal and fetal emergencies and complications without the adequate resources. While  
571           many of the stressors were at the policy and interpersonal levels, coping strategies were  
572           overwhelmingly at the intrapersonal and interpersonal levels, and included reaching out to  
573           others, seeking help from a higher power, and dealing with it by oneself through self-  
574           distraction, meditation, relaxation, and exercise.

575

576 High work load, unfavourable work conditions, role ambiguity, and workplace  
577 conflict, and low rewards/incentives are all previously well-documented stressors,<sup>5,6</sup> further  
578 confirmed by our findings. High workload and lack of resources are unsurprisingly the main  
579 drivers of stress, as would be expected in resource-constrained environments. This is  
580 particularly salient in Kenya, where health systems are stretched and where there is  
581 approximately one hospital bed per 1,000 people and 1.5 medical doctors and 8.3  
582 nurses/midwives per 10,000 people.<sup>38,39</sup> The lack of work resources and inadequate rewards  
583 are evidenced by frequent and long standing threats of and actual labor strikes by various  
584 cadres of health care workers, including during the COVID-19 pandemic.<sup>40-42</sup> Resource  
585 shortages were reported to lead to an illicit marketplace where providers felt patients were  
586 being taken advantage of, and felt conflicted in their allegiance to their fellow providers and  
587 to patients, leading to added stress.

588  
589 The high pressure and high stakes work environment, further compounded by the  
590 occurrence of avoidable adverse outcomes, is demoralizing to providers. The confluence of  
591 heavy workloads, insufficient staffing, and inadequate resources means that providers often  
592 had to balance professional standards with the expectations of patients and their families.  
593 These otherwise avoidable adverse outcomes create high tension environments where  
594 providers fear blame and accusation, as has been previously documented.<sup>26,43-45</sup> Providers  
595 witnessing the death of a patient due to otherwise manageable conditions, witnessing a child  
596 dying of breathing difficulties due to lack of oxygen and long-distances to well-equipped  
597 facilities, coupled with poor staff management, low remunerations and long hours have all  
598 been previously reported stressors in SSA.<sup>46, 19, 47</sup> Similarly, about one of four providers in  
599 our quantitative cohort reported losing a mother or a baby in the past year, potentially  
600 contributing to their existing fear of adverse outcomes and subsequent blame from patients

601 and their families. This complex care provision setting fuels an environment where abuse,  
602 disrespect, and non-patient centred care are used as means of gaining patient compliance; in  
603 these instances, providers often justified verbally or physically abusing mothers for fear of  
604 losing the baby or mother.<sup>26,44,45</sup> Concurrent with these findings, our quantitative findings  
605 have demonstrated that high stress and burnout are associated with low self-reported  
606 provision person-centred maternity care.<sup>27</sup> In our published quantitative analysis using  
607 validated psychosocial measures of stress, nearly all the providers (96%) had moderate to  
608 high levels of stress and more than 80% had some level of burnout, with 20% having high  
609 levels of burnout indicative of burnout of clinical concern.<sup>20</sup> Our findings, concurrent with  
610 previous findings, also underscore the longstanding dissatisfaction among health care  
611 providers which remains unresolved.<sup>48,49</sup>

612

613         These stressors must be addressed to better support providers and improve health  
614 outcomes, especially in the context of COVID-19 and increasingly stretched health systems.  
615 While the health systems stressors appear insurmountable, our findings suggest some  
616 practical ways to address them. For example, while the high patient to provider ratio is a  
617 major driver of stress, providers shared a more pressing concern- the frequent transfer of staff  
618 across health facilities. This challenge can be addressed through better forecasting, planning,  
619 and through conducting a needs assessment of impacted facilities prior to initiating the  
620 transfers. Further, health management teams can consider minimum service periods for  
621 providers to ensure there are no service gaps, unless necessary. Streamlining administrative  
622 work and documentation and undertaking efforts to improve the maternity unit to attract and  
623 motivate providers, can go a long way towards addressing high workloads. Finally, better  
624 supply chain management and logistical planning can help prevent supply shortage and avert  
625 adverse outcomes.

626 Our findings on interpersonal stressors from interactions with superiors and colleagues are  
627 concurrent with previous findings.<sup>7,50</sup> Studies have also highlighted the role of  
628 communication from management on stress and burnout as well as overall satisfaction.<sup>49,51</sup>  
629 Open communication channels from management and employees has also been shown to  
630 reduce stress, while poor interaction and communication among colleagues and management  
631 has been shown to result in increased stress.<sup>7,50</sup> These stressors, arguably easier to intervene  
632 on as compared to the health systems stressors, have been the target of past interventions. An  
633 ethnographic study of neonatal nurses in Kenya identified flexibility, autonomy, and limited  
634 managerial oversight as a collective stress coping mechanism.<sup>52</sup> In our study, the experience  
635 of disrespect from a supervisor or colleague in about a third of our study population,  
636 underscores the urgent need for interventions to improve supportive supervision and a  
637 positive workplace culture. Similarly, stress emanating from patients' attitudes, non-  
638 compliance, and negative behaviours can be addressed through efforts to better understand  
639 patients. Some stressors also stemmed from non-work sources including family members,  
640 children, and partners, underscoring the multi-dimensional stressors that impact providers'  
641 mental health.

642

643 The unavoidable stressors in this environment require that providers focus on building their  
644 resilience and adapting positive coping strategies. Most of the coping strategies employed by  
645 providers in this setting are positive and have been targeted in prior interventions. Previous  
646 studies have also highlighted the role of problem solving, positive re-appraisal, religiosity,  
647 optimism, and the maladaptive strategy of self-distraction.<sup>53,54,55, 17</sup> Providers sought counsel  
648 with friends, family members, and others, and turned to religion or spirituality. Further,  
649 counseling centers within healthcare facilities staffed with qualified psychologists has been  
650 shown to minimize occupational stress.<sup>56,57</sup> The frequent exposure of maternity providers to

651 adverse events necessitates the availability of mental health support that is accessible and  
652 responsive. Of note, only 13% of providers in our study reported ever participating in a stress  
653 management training,<sup>27</sup> while only a few providers reported physical exercise, meditation,  
654 taking deep breaths or other coping mechanisms. Providers need to be introduced to  
655 evidence-based coping mechanisms and dissuaded from adapting negative coping behaviors.  
656 However, individual response strategies to manage stress, are limited in the context of  
657 broader health systems challenges.

658

659 Finally, in SSA specifically, there is a scarcity of data on interventions to address healthcare  
660 providers' stress and promote their well-being. Among the few interventions, efforts to  
661 improve working conditions such as better remuneration, increasing essential materials, and  
662 improved communication with management have been shown to be effective.<sup>46,47,58,59</sup> Our  
663 findings, combined with the increasing disease burden, impact of COVID-19, and limited  
664 resources in SSA, all underscore the need for interventions to prevent and address stress and  
665 burnout, while nurturing resilience and improving governance to empower health care  
666 systems.<sup>13,60</sup> Similar findings from Kenya, in addition to resource allocation, highlight the  
667 role of conflict resolution and incentives to assist health workers in coping with work-related  
668 stress.<sup>58</sup>

669

## 670 **Limitations**

671 First, data were collected in only one predominantly rural county in Kenya, thus limiting the  
672 generalizability. Nevertheless, data were gathered across many facilities representing  
673 government, private and other health centers, and among varied informants including a range  
674 of cadre responsible for maternal health care provision and supportive roles. Second, because  
675 the semi structured guides focused on sources of stress within the context of care provision,

676 narratives overwhelmingly are about health systems level challenges. Thus, limited data on  
677 individual-level stressors among providers may be due to the way the guide was structured;  
678 although this does not reduce the value of the findings with regards to work related sources of  
679 stress. Analysis and interpretation involved the full study team including those who collected  
680 the data, strengthening the rigor of the study and validity of data interpretation.

681

## 682 **Conclusions**

683 The perennial stressors within health care systems that we and others have identified, calls for  
684 the integration of programs to reduce the sources of stress and promote positive coping  
685 mechanisms. Our findings underscore the need to address various issues at the health  
686 systems, organizational, interpersonal, and individual levels. Strategies are needed to support  
687 staff retention, provide adequate resources to deliver care, provide incentives to motivate  
688 providers, and promote supportive supervision and a respectful workplace culture. Further,  
689 mental health support to enhance personal coping strategies, including an appraisal of  
690 effective interventions, are urgently needed. To improve patient outcomes, we must care for  
691 the caregivers.

692

## 693 **Acknowledgments**

694 We would like to thank the research study participants and providers for sharing their insights  
695 and time. Further, we wish to thank the administrators and county leadership for providing  
696 their support for this study.

697

## 698 **Funding**

699 This study is funded by a Eunice Kennedy Shriver National Institute of Child Health and  
700 Human development K99/R00 grant to PA [K99HD093798/ R00HD093798]. The funders

701 had no role in the study design, data collection and analysis, decision to publish, or  
702 preparation of the manuscript.

703

## 704 **References**

- 705 1. McEwen BS. Stressed or stressed out: What is the difference? *J Psychiatry Neurosci.*  
706 2005;30(5):315-318.
- 707 2. Maslach C, Schaufeli WB, Leiter MP. Job burnout. *Annu Rev Psychol.* 2001;52:397-  
708 422. doi:10.1146/annurev.psych.52.1.397
- 709 3. Maslach C, Leiter MP. Understanding the burnout experience: recent research and its  
710 implications for psychiatry. *World Psychiatry.* 2016;15(2):103-111.  
711 doi:10.1002/wps.20311
- 712 4. Hall LH, Johnson J, Watt I, Tsipa A, O'Connor DB. Healthcare Staff Wellbeing,  
713 Burnout, and Patient Safety: A Systematic Review. *PLoS One.* 2016;11(7).  
714 doi:10.1371/journal.pone.0159015
- 715 5. Kim MH, Mazenga AC, Simon K, et al. Burnout and self-reported suboptimal patient  
716 care amongst health care workers providing HIV care in Malawi. *PLOS ONE.*  
717 2018;13(2):e0192983. doi:10.1371/journal.pone.0192983
- 718 6. Birhanu M, Gebrekidan B, Tesefa G, Tareke M. Workload Determines Workplace  
719 Stress among Health Professionals Working in Felege-Hiwot Referral Hospital, Bahir  
720 Dar, Northwest Ethiopia. *J Environ Public Health.* 2018;2018.  
721 doi:10.1155/2018/6286010
- 722 7. Salame H, ALBashtawy M. Managing Workplace Stress among Health Care Providers.  
723 2019;8:792-794.
- 724 8. Maslach C, Leiter MP. Early predictors of job burnout and engagement. *J Appl Psychol.*  
725 2008;93(3):498-512. doi:10.1037/0021-9010.93.3.498
- 726 9. de Oliveira GS, Chang R, Fitzgerald PC, et al. The prevalence of burnout and  
727 depression and their association with adherence to safety and practice standards: a  
728 survey of United States anesthesiology trainees. *Anesth Analg.* 2013;117(1):182-193.  
729 doi:10.1213/ANE.0b013e3182917da9
- 730 10. Papathanasiou IV, Tsaras K, Kleisiaris CF, Fradelos EC, Tsaloglidou A, Damigos D.  
731 Anxiety and Depression in Staff of Mental Units: The Role of Burnout. *Adv Exp Med*  
732 *Biol.* 2017;987:185-197. doi:10.1007/978-3-319-57379-3\_17
- 733 11. Rath KS, Huffman LB, Phillips GS, Carpenter KM, Fowler JM. Burnout and associated  
734 factors among members of the Society of Gynecologic Oncology. *American Journal of*  
735 *Obstetrics & Gynecology.* 2015;213(6):824.e1-824.e9. doi:10.1016/j.ajog.2015.07.036
- 736 12. Lancet T. Physician burnout: a global crisis. *The Lancet.* 2019;394(10193):93.  
737 doi:10.1016/S0140-6736(19)31573-9



- 738 13. Dubale BW, Friedman LE, Chemali Z, et al. Systematic review of burnout among  
739 healthcare providers in sub-Saharan Africa. *BMC Public Health*. 2019;19(1):1247.  
740 doi:10.1186/s12889-019-7566-7
- 741 14. Khalil D. Violence against midwives in Cape Town. *African Journal of Midwifery and*  
742 *Women's Health*. 2009;3(1):37-40. doi:10.12968/ajmw.2009.3.1.39414
- 743 15. Filby A, McConville F, Portela A. What Prevents Quality Midwifery Care? A  
744 Systematic Mapping of Barriers in Low and Middle Income Countries from the Provider  
745 Perspective. *PLOS ONE*. 2016;11(5):e0153391. doi:10.1371/journal.pone.0153391
- 746 16. Fauveau V, Sherratt DR, de Bernis L. Human resources for maternal health: multi-  
747 purpose or specialists? *Hum Resour Health*. 2008;6:21. doi:10.1186/1478-4491-6-21
- 748 17. Kokonya D, Mburu J, Kathuku D, et al. Burnout Syndrome among Medical Workers at  
749 Kenyatta National Hospital(KNH), Nairobi, Kenya. *African Journal of Psychiatry*.  
750 2014;17(6). doi:10.4172/PSYCHIATRY.1000142
- 751 18. Lasebikan VO, Oyetunde MO. Burnout among Nurses in a Nigerian General Hospital:  
752 Prevalence and Associated Factors. *ISRN Nurs*. 2012;2012:402157.  
753 doi:10.5402/2012/402157
- 754 19. Muriithi JW, Kariuki PW. Work-related Determinants of Nurses' Burnout in Pumwani  
755 Maternity Hospital, Nairobi City County, Kenya. *Asian Journal of Research in Nursing*  
756 *and Health*. 2020;3(2):36-49.
- 757 20. Afulani PA, Onger L, Kinyua J, Temmerman M, Mendes WB, Weiss SJ. Psychological  
758 and physiological stress and burnout among maternity providers in a rural county in  
759 Kenya: individual and situational predictors. *BMC Public Health*. 2021;21(1):453.  
760 doi:10.1186/s12889-021-10453-0
- 761 21. Muliira RS, Ssendikadiwa VB. Professional Quality of Life and Associated Factors  
762 Among Ugandan Midwives Working in Mubende and Mityana Rural Districts. *Matern*  
763 *Child Health J*. 2016;20(3):567-576. doi:10.1007/s10995-015-1855-2
- 764 22. Halbesleben JRB, Rathert C. Linking physician burnout and patient outcomes: exploring  
765 the dyadic relationship between physicians and patients. *Health Care Manage Rev*.  
766 2008;33(1):29-39. doi:10.1097/01.HMR.0000304493.87898.72
- 767 23. Ndwiga C, Warren CE, Ritter J, Sripad P, Abuya T. Exploring provider perspectives on  
768 respectful maternity care in Kenya: "Work with what you have." *Reprod Health*.  
769 2017;14(1):99. doi:10.1186/s12978-017-0364-8
- 770 24. Burrowes S, Holcombe SJ, Jara D, Carter D, Smith K. Midwives' and patients'  
771 perspectives on disrespect and abuse during labor and delivery care in Ethiopia: a  
772 qualitative study. *BMC Pregnancy Childbirth*. 2017;17(1):263. doi:10.1186/s12884-  
773 017-1442-1
- 774 25. Okedo-Alex IN, Akamike IC, Nwafor JI, Abateneh DD, Uneke CJ. Multi-stakeholder  
775 Perspectives on the Maternal, Provider, Institutional, Community, and Policy Drivers of  
776 Disrespectful Maternity Care in South-East Nigeria. *Int J Womens Health*.  
777 2020;12:1145-1159. doi:10.2147/IJWH.S277827

- 778 26. Afulani PA, Kelly AM, Buback L, Asunka J, Kirumbi L, Lyndon A. Providers'  
779 perceptions of disrespect and abuse during childbirth: a mixed-methods study in Kenya.  
780 *Health Policy and Planning*. 2020;(czaa009). doi:10.1093/heapol/czaa009
- 781 27. Afulani PA, Aborigo RA, Nutor JJ, et al. Self-reported provision of person-centred  
782 maternity care among providers in Kenya and Ghana: scale validation and examination  
783 of associated factors. *BMJ Global Health*. 2021;6(12):e007415. doi:10.1136/bmjgh-  
784 2021-007415
- 785 28. Schneiderman N, Ironson G, Siegel SD. STRESS AND HEALTH: Psychological,  
786 Behavioral, and Biological Determinants. *Annu Rev Clin Psychol*. 2005;1:607-628.  
787 doi:10.1146/annurev.clinpsy.1.102803.144141
- 788 29. Dugani S, Afari H, Hirschhorn LR, et al. Prevalence and factors associated with burnout  
789 among frontline primary health care providers in low- and middle-income countries: A  
790 systematic review. *Gates Open Res*. 2018;2:4. doi:10.12688/gatesopenres.12779.3
- 791 30. Salaree MM, Zareiyan A, Ebadi A, Salaree M. Coping Strategies Used by Iranian  
792 Nurses to Deal With Burnout: A Qualitative Research. *Glob J Health Sci*.  
793 2014;6(6):273-280. doi:10.5539/gjhs.v6n6p273
- 794 31. Kheswa JG. Factors and effects of work-related stress and burnout on the well-being of  
795 social workers in the Eastern Cape province, South Africa. *SA Journal of Industrial  
796 Psychology*. 2019;45(1):1-10. doi:10.4102/sajip.v45i0.1661
- 797 32. Selamu M, Thornicroft G, Fekadu A, Hanlon C. Conceptualisation of job-related  
798 wellbeing, stress and burnout among healthcare workers in rural Ethiopia: a qualitative  
799 study. *BMC Health Serv Res*. 2017;17(1):412. doi:10.1186/s12913-017-2370-5
- 800 33. Afulani P, Kusi C, Kirumbi L, Walker D. Companionship during facility-based  
801 childbirth: results from a mixed-methods study with recently delivered women and  
802 providers in Kenya. *BMC Pregnancy Childbirth*. 2018;18(1):150. doi:10.1186/s12884-  
803 018-1806-1
- 804 34. Afulani PA, Ogolla BA, Oboke EN, et al. Understanding disparities in person-centred  
805 maternity care: the potential role of provider implicit and explicit bias. *Health Policy  
806 Plan*. 2021;36(3):298-311. doi:10.1093/heapol/czaa190
- 807 35. Using thematic analysis in psychology: Qualitative Research in Psychology: Vol 3, No  
808 2. Accessed April 19, 2022.  
809 <https://www.tandfonline.com/doi/abs/10.1191/1478088706qp063oa>
- 810 36. Guetterman TC, Fetters MD, Creswell JW. Integrating Quantitative and Qualitative  
811 Results in Health Science Mixed Methods Research Through Joint Displays. *Ann Fam  
812 Med*. 2015;13(6):554-561. doi:10.1370/afm.1865
- 813 37. Fetters MD, Curry LA, Creswell JW. Achieving Integration in Mixed Methods  
814 Designs—Principles and Practices. *Health Serv Res*. 2013;48(6 Pt 2):2134-2156.  
815 doi:10.1111/1475-6773.12117

- 816 38. Barasa EW, Ouma PO, Okiro EA. Assessing the hospital surge capacity of the Kenyan  
817 health system in the face of the COVID-19 pandemic. *PLOS ONE*.  
818 2020;15(7):e0236308. doi:10.1371/journal.pone.0236308
- 819 39. Kenya Ministry of Health. Kenya Health Workforce Report: The Status of Healthcare  
820 Professionals in Kenya, 2015. Published online 2015.
- 821 40. Waithaka D, Kagwanja N, Nzinga J, et al. Prolonged health worker strikes in Kenya-  
822 perspectives and experiences of frontline health managers and local communities in  
823 Kilifi County. *International Journal for Equity in Health*. 2020;19(1):23.  
824 doi:10.1186/s12939-020-1131-y
- 825 41. Scanlon ML, Maldonado LY, Ikemeri JE, et al. A retrospective study of the impact of  
826 health worker strikes on maternal and child health care utilization in western Kenya.  
827 *BMC Health Services Research*. 2021;21(1):898. doi:10.1186/s12913-021-06939-7
- 828 42. Wasike A. Kenya faces crisis as healthcare workers strike. Published December 8, 2020.  
829 Accessed June 9, 2021. [https://www.aa.com.tr/en/africa/kenya-faces-crisis-as-](https://www.aa.com.tr/en/africa/kenya-faces-crisis-as-healthcare-workers-strike/2069571)  
830 [healthcare-workers-strike/2069571](https://www.aa.com.tr/en/africa/kenya-faces-crisis-as-healthcare-workers-strike/2069571)
- 831 43. Mohammad KI, Al-Reda AN, Aldalaykeh M, et al. Personal, professional and  
832 workplace factors associated with burnout in Jordanian midwives: A national study.  
833 *Midwifery*. 2020;89:102786. doi:10.1016/j.midw.2020.102786
- 834 44. Bohren MA, Vogel JP, Tunçalp Ö, et al. “By slapping their laps, the patient will know  
835 that you truly care for her”: A qualitative study on social norms and acceptability of the  
836 mistreatment of women during childbirth in Abuja, Nigeria. *SSM - Population Health*.  
837 2016;2:640-655. doi:10.1016/j.ssmph.2016.07.003
- 838 45. Dzomeku V, Bemah A, Nakua EK, Lori JR, Donkor P. “I Wouldn’t Have Hit You, but  
839 You Would Have Killed Your Baby:” Exploring Midwives’ Perspectives on Disrespect  
840 and Abusive Care in Ghana. In Review; 2019. doi:10.21203/rs.2.12607/v5
- 841 46. Burnout a ticking time bomb among medical staff. Nation. Accessed September 24,  
842 2020. [https://nation.africa/kenya/newsplex/burnout-a-ticking-time-bomb-among-](https://nation.africa/kenya/newsplex/burnout-a-ticking-time-bomb-among-medical-staff-155750)  
843 [medical-staff-155750](https://nation.africa/kenya/newsplex/burnout-a-ticking-time-bomb-among-medical-staff-155750)
- 844 47. Gichara RW. Burnout in Nurses at a Referral Hospital in Western Kenya. *IJARBSS*.  
845 2017;7(11):Pages 704-715. doi:10.6007/IJARBSS/v7-i11/3508
- 846 48. Doef M van der, Mbazzi FB, Verhoeven C. Job conditions, job satisfaction, somatic  
847 complaints and burnout among East African nurses. *Journal of Clinical Nursing*.  
848 2012;21(11-12):1763-1775. doi:10.1111/j.1365-2702.2011.03995.x
- 849 49. Afulani PA, Nutor JJ, Agbadi P, et al. Job satisfaction among healthcare workers in  
850 Ghana and Kenya during the COVID-19 pandemic: Role of perceived preparedness,  
851 stress, and burnout. *PLOS Global Public Health*. 2021;1(10):e0000022.  
852 doi:10.1371/journal.pgph.0000022
- 853 50. Kebede G. Work Related Stress among Health Care Workers in Mekelle City  
854 Administration Public Hospitals, North Ethiopia. Published online February 21, 2018.

- 855 51. Afulani PA, Gyamerah AO, Nutor JJ, et al. Inadequate preparedness for response to  
856 COVID-19 is associated with stress and burnout among healthcare workers in Ghana.  
857 *PLOS ONE*. 2021;16(4):e0250294. doi:10.1371/journal.pone.0250294
- 858 52. McKnight J, Nzinga J, Jepkosgei J, English M. Collective strategies to cope with work  
859 related stress among nurses in resource constrained settings: An ethnography of  
860 neonatal nursing in Kenya. *Social Science & Medicine*. 2019;245:112698.  
861 doi:10.1016/j.socscimed.2019.112698
- 862 53. McKinley N, McCain RS, Convie L, et al. Resilience, burnout and coping mechanisms  
863 in UK doctors: a cross-sectional study. *BMJ Open*. 2020;10(1):e031765.  
864 doi:10.1136/bmjopen-2019-031765
- 865 54. Chang Y, Chan HJ. Optimism and proactive coping in relation to burnout among nurses.  
866 *J Nurs Manag*. 2015;23(3):401-408. doi:10.1111/jonm.12148
- 867 55. Jan F, Kour S, Para MA. Coping Strategies Used by Staff Nurses Working in  
868 Emergency and General Wards of SKIMS Hospital: A Comparative Study. *Annals of*  
869 *Medical and Health Sciences Research*. Published online 2017. Accessed September 29,  
870 2020. [https://www.amhsr.org/abstract/coping-strategies-used-by-staff-nurses-working-](https://www.amhsr.org/abstract/coping-strategies-used-by-staff-nurses-working-in-emergency-and-general-wards-of-skims-hospital-a-comparative-study-3903.html)  
871 [in-emergency-and-general-wards-of-skims-hospital-a-comparative-study-3903.html](https://www.amhsr.org/abstract/coping-strategies-used-by-staff-nurses-working-in-emergency-and-general-wards-of-skims-hospital-a-comparative-study-3903.html)
- 872 56. Kruse GR, Chapula BT, Ikeda S, et al. Burnout and use of HIV services among health  
873 care workers in Lusaka District, Zambia: a cross-sectional study. *Hum Resour Health*.  
874 2009;7:55. doi:10.1186/1478-4491-7-55
- 875 57. Odonkor ST, Adams S. Predictors of stress and associated factors among healthcare  
876 workers in Western Ghana. *Heliyon*. 2021;7(6):e07223.  
877 doi:10.1016/j.heliyon.2021.e07223
- 878 58. Muriithi JW, Kariuki PW. Work-related Determinants of Nurses' Burnout in Pumwani  
879 Maternity Hospital, Nairobi City County, Kenya. *Asian Journal of Research in Nursing*  
880 *and Health*. Published online June 23, 2020:36-49.
- 881 59. Villiers MD, Villiers PD. Doctors' views of working conditions in rural hospitals in the  
882 Western Cape. *South African Family Practice*. 2004;46(3):21-26.
- 883 60. Kagwanja N, Waithaka D, Nzinga J, et al. Shocks, stress and everyday health system  
884 resilience: experiences from the Kenyan coast. *Health Policy Plan*. 2020;35(5):522-535.  
885 doi:10.1093/heapol/czaa002

886
